# Supplementary material
Source: PubMed Central journal article supplement (PMC6283945)
Supplement: rspb20182141supp2.pdf [file rspb20182141supp2.pdf]

| Year | Ring Number | ID code | Treatment | Age | Time | Bleeding Duration (s) | Body mass (g) | Body condition (g) | Wing (cm) | Tarsus (mm) | Roms (mM H2O2 equivalents) | Oxy (umol HOCl/mL) | Gpx (U/L) | Cort (ng/mL) | Protein carbonyls (nmol/mg of proteins) | ClutchSize | Hatching date | Number of fledglings |
|------|-------------|---------|-----------|-----|------|-----------------------|---------------|--------------------|-----------|-------------|----------------------------|--------------------|-----------|--------------|-----------------------------------------|------------|---------------|----------------------|
| 2015 | C3F8513     | A05     | C         | Y   | ante | 175                   | 17.2          | 14.96              | 7.8       | 19.8        | 1.69                       | 169.83             |           | 23.63        |                                         | 6          | 42127         | 6                    |
| 2015 | C3F8516     | A08     | C         | A   | ante | 137                   | 18.8          | 17.69              | 7.6       | 20.2        | 2.51                       | 284.58             | 36.95     | 13.29        | 0.83                                    | 11         | 42132         | 11                   |
| 2015 | C3F8519     | A11     | E         | Y   | ante | 171                   | 17.6          | 13.65              | 8.1       | 21.3        | 4.03                       | 252.80             | 24.63     | 9.07         | 1.94                                    | 7          | 42132         | 6                    |
| 2015 | C3F8521     | A13     | C         | A   | ante | 120                   | 17.3          | 16.28              | 7.6       | 20.7        | 1.08                       | 308.88             | 16.04     |              | 1.26                                    | 9          | 42132         | 9                    |
| 2015 | C3F8523     | A15     | E         | A   | ante | 140                   | 17.8          | 15.48              | 7.8       | 21.5        | 2.35                       | 155.65             |           | 2.42         |                                         | 10         | 42132         | 10                   |
| 2015 | C3F8524     | A16     | C         | A   | ante | 114                   | 17.6          | 16.56              | 7.6       | 19.7        | 2.38                       | 439.50             | 19.79     | 3.66         | 0.48                                    | 7          | 42132         | 7                    |
| 2015 | C3F8526     | A18     | E         | A   | ante | 95                    | 18.9          | 17.79              | 7.6       | 20.6        | 3.57                       | 418.73             | 5.05      | 3.66         | 1.07                                    | 8          | 42131         | 6                    |
| 2015 | C3F8527     | A19     | E         | A   | ante | 178                   | 17.6          | 17.96              | 7.4       | 20.7        | 0.21                       | 213.15             |           | 7.07         |                                         | 6          | 42134         | 5                    |
| 2015 | C3F8529     | A21     | C         | Y   | ante | 145                   | 18.2          | 16.46              | 7.7       | 21.4        | 2.42                       | 300.08             | 7.40      | 5.52         | 0.10                                    | 7          | 42140         | 5                    |
| 2015 | C3F8530     | A22     | E         | Y   | ante | 178                   | 17.4          | 15.13              | 7.8       | 19.6        | 3.03                       | 270.93             | 10.77     | 10.72        | 0.09                                    | 7          | 42134         | 6                    |
| 2015 | C3F8532     | A24     | C         | A   | ante | 153                   | 18.5          | 17.41              | 7.6       | 20.1        | 1.74                       | 415.61             | 9.08      | 13.98        | 3.50                                    | 9          | 42134         | 5                    |
| 2015 | C3F8534     | A26     | E         | A   | ante | 179                   | 17.7          | 16.01              | 7.7       | 19.2        | 1.17                       | 321.14             | 8.75      | 2.64         | 3.02                                    | 8          | 42134         | 4                    |
| 2015 | C3F8536     | A28     | C         | A   | ante | 172                   | 17.0          | 14.22              | 7.9       | 19.9        | 0.58                       | 149.72             |           | 5.37         |                                         | 7          | 42134         | 5                    |
| 2015 | C3F8537     | A29     | E         | Y   | ante | 150                   | 17.7          | 14.25              | 8.0       | 20.0        | 2.47                       | 365.60             | 17.16     | 12.19        | 0.61                                    | 6          | 42134         | 5                    |
| 2015 | C3F8539     | A31     | C         | A   | ante | 145                   | 17.8          | 16.75              | 7.6       | 19.1        | 3.51                       | 281.66             | 14.47     | 3.02         | 3.17                                    | 7          | 42135         | 7                    |
| 2015 | C3F8541     | A33     | C         | A   | ante | 80                    | 17.6          | 17.25              | 7.5       | 20.2        | 3.74                       | 225.47             | 28.26     | 4.51         | 0.45                                    | 8          | 42137         | 8                    |
| 2015 | C3F8543     | A35     | E         | A   | ante | 127                   | 18.1          | 15.14              | 7.9       | 19.7        | 1.39                       | 188.71             | 9.76      | 3.94         | 0.74                                    | 7          | 42135         | 7                    |
| 2015 | C3F8550     | A42     | C         | Y   | ante | 130                   | 19.2          | 16.06              | 7.9       | 21.2        | 4.44                       | 172.58             | 3.36      | 18.08        | 4.27                                    | 8          | 42135         | 8                    |
| 2015 | C3F8552     | A44     | E         | A   | ante | 180                   | 17.6          | 15.92              | 7.7       | 20.0        | 2.43                       | 251.63             | 8.24      | 2.77         | 2.25                                    | 8          | 42136         | 6                    |
| 2015 | C3F8553     | A45     | E         | A   | ante | 169                   | 18.2          | 17.83              | 7.5       | 20.2        | 1.51                       | 176.57             |           | 9.77         |                                         | 10         | 42136         | 6                    |
| 2015 | C3F8557     | A49     | E         | A   | ante | 180                   | 16.8          | 14.61              | 7.8       | 20.2        | 0.64                       | 111.18             |           | 5.18         |                                         | 8          | 42137         | 2                    |
| 2015 | C3F8558     | A50     | C         | A   | ante | 131                   | 17.8          | 16.10              | 7.7       | 20.2        | 1.80                       | 201.96             | 19.85     | 14.12        | 3.07                                    | 6          | 42138         | 2                    |
| 2015 | C3F8559     | A51     | E         | A   | ante | 138                   | 18.3          | 21.18              | 7.1       | 20.0        | 3.58                       | 335.19             | 12.79     | 5.2          | 2.99                                    | 8          | 42138         | 8                    |
| 2015 | C3F8560     | A52     | E         | Y   | ante | 150                   | 19.8          | 18.64              | 7.6       | 19.8        | 1.66                       | 315.22             | 15.14     | 5.14         | 2.41                                    | 8          | 42138         | 8                    |
| 2015 | C3F8563     | A55     | C         | A   | ante | 180                   | 17.6          | 17.25              | 7.5       | 19.7        | 1.18                       | 215.49             | 4.04      | 4.78         | 2.75                                    | 6          | 42140         | 5                    |
| 2015 | C3F8565     | A57     | E         | A   | ante | 126                   | 17.2          | 18.30              | 7.3       | 19.9        | 2.85                       | 361.10             | 18.51     | 11.06        | 2.09                                    | 5          | 42140         | 5                    |
| 2015 | C3F8566     | A58     | E         | Y   | ante | 172                   | 18.1          | 19.25              | 7.3       | 20.3        | 0.70                       | 118.26             | 26.92     | 11.02        | 2.26                                    | 7          | 42141         | 2                    |
| 2015 | C3F8572     | A64     | C         | A   | ante | 180                   | 17.4          | 20.14              | 7.1       | 19.0        | 4.00                       | 224.51             | 27.59     | 6.24         | 2.57                                    | 7          | 42146         | 7                    |
| 2015 | C3F8574     | A66     | E         | A   | ante | 138                   | 17.2          | 17.56              | 7.4       | 20.0        | 0.40                       | 291.90             | 17.67     | 15.09        | 0.30                                    | 8          | 42151         | 4                    |
| 2015 | C3F8576     | A68     | E         | Y   | ante | 110                   | 17.5          | 16.47              | 7.6       | 19.1        | 1.66                       | 129.97             | 12.62     | 6.96         | 2.30                                    | 5          | 42157         | 5                    |
| 2016 | C3F8588     | A80     | E         | A   | ante | 130                   | 17.8          | 16.10              | 7.7       | 19.9        | 2.22                       | 272.70             | 20.02     | 6            | 2.26                                    | 7          | 42498         | 4                    |
| 2016 | C3F8596     | A88     | E         | Y   | ante | 175                   | 17.8          | 18.17              | 7.4       | 20.4        | 1.54                       | 303.89             | 17.67     | 1.12         | 15.05                                   | 9          | 42501         | 5                    |
| 2016 | C3K6201     | A91     | C         | A   | ante | 150                   | 17.4          | 17.76              | 7.4       | 19.1        | 2.22                       | 249.06             | 13.14     | 4.86         | 1.04                                    | 7          | 42502         | 5                    |
| 2016 | C3K6203     | A93     | C         | A   | ante | 155                   | 18.1          | 17.04              | 7.6       | 20.1        | 1.21                       | 277.00             | 3.36      | 3.92         | 1.90                                    | 8          | 42502         | 6                    |
| 2016 | C3K6205     | A95     | C         | Y   | ante | 145                   | 17.6          | 17.25              | 7.5       | 19.9        | 2.13                       | 279.70             | 20.53     | 0.49         | 4.65                                    | 10         | 42505         | 4                    |
| 2016 | C3K6207     | A97     | E         | Y   | ante | 130                   | 17.6          | 17.25              | 7.5       | 20.0        | 1.31                       | 148.02             | 11.44     | 1.48         | 0.47                                    | 9          | 42505         | 5                    |
| 2016 | C3K6209     | A99     | C         | A   | ante | 180                   | 18.2          | 17.83              | 7.5       | 20.2        | 1.92                       | 338.07             | 24.56     | 4.09         | 2.80                                    | 7          | 42505         | 7                    |
| 2016 | C3K6210     | A100    | C         | A   | ante | 155                   | 17.7          | 18.07              | 7.4       | 19.9        | 2.60                       | 306.13             | 30.96     | 1.44         | 0.75                                    | 6          | 42507         | 4                    |
| 2016 | C3K6212     | A102    | C         | A   | ante |                       |               |                    | 7.5       | 21.0        |                            |                    |           |              |                                         | 7          | 42507         | 7                    |
| 2016 | C3K6218     | A108    | E         | A   | ante | 180                   | 16.9          | 15.91              | 7.6       | 20.5        | 2.16                       | 353.55             | 38.02     | 5.83         | 4.76                                    | 6          | 42527         | 6                    |
| 2016 | C3K6219     | A109    | E         | A   | ante | 138                   | 17.0          | 16.66              | 7.5       | 19.5        | 1.24                       | 250.84             | 27.59     | 7.65         | 0.00                                    | 7          | 42528         | 2                    |
| 2016 | C3K6220     | A110    | E         | Y   | ante |                       | 17.0          | 16.00              | 7.6       | 19.9        | 6.06                       | 263.69             | 6.39      |              | 0.00                                    | 7          | 42497         | 5                    |
| 2016 | C3K6221     | A111    | C         | Y   | ante | 104                   | 17.3          | 16.28              | 7.6       | 19.9        | 12.70                      |                    | 29.95     | 12.14        | 0.69                                    | 9          | 42496         | 6                    |
| 2016 | C3K6222     | A112    | E         | A   | ante | 225                   | 17.5          | 17.86              | 7.4       | 20.0        | 1.81                       | 99.59              | 33.98     | 6.09         | 1.21                                    | 9          | 42503         | 4                    |
| 2016 | C3K6225     | A115    | E         | A   | ante | 180                   | 17.5          | 14.64              | 7.9       | 20.2        | 2.64                       | 365.43             | 33.65     | 13.15        | 0.16                                    | 6          | 42534         | 6                    |
| 2016 | C3K6227     | A117    | C         | A   | ante | 138                   | 16.4          | 16.07              | 7.5       | 19.8        |                            |                    | 19.85     | 4.68         | 0.00                                    | 9          | 42536         | 6                    |
| 2016 | C3F8622     | N22     | C         | Y   | ante | 218                   | 17.2          | 16.85              | 7.5       | 20.0        | 2.34                       | 339.93             | 25.07     | 5.94         | 8.91                                    | 8          | 42498         | 6                    |
| 2016 | C3F8695     | N95     | E         | Y   | ante | 170                   | 17.4          | 17.76              | 7.4       | 20.3        | 1.91                       | 367.38             | 28.60     | 14.24        | 4.53                                    | 9          | 42498         | 7                    |
| 2016 | C3F8607     | N07     | C         | Y   | ante | 165                   | 16.9          | 17.98              | 7.3       | 19.9        | 1.37                       | 191.63             | 19.68     | 3.84         | 0.52                                    | 9          | 42500         | 7                    |
| 2016 | C3F8523     | A15b    | E         | A   | ante | 120                   | 18.4          | 15.39              | 7.9       | 20.8        | 1.07                       | 169.73             | 15.14     | 3.09         | 3.85                                    | 8          | 42492         | 8                    |
| 2016 | C3F8558     | A50b    | C         | A   | ante |                       | 17.5          | 15.83              | 7.7       | 20.0        |                            | 368.86             |           | 8.97         | 0.00                                    | 11         | 42502         | 1                    |
| 2016 | C3F8565     | A57b    | C         | A   | ante | 180                   | 15.5          | 15.19              | 7.5       | 19.6        | 2.23                       | 223.39             | 22.54     | 14.61        | 3.44                                    | 7          | 42502         | 5                    |
| 2016 | C3F8570     | A62b    | E         | A   | ante | 154                   | 18.2          | 18.58              | 7.4       | 19.8        | 1.47                       | 262.30             | 24.90     | 9.71         | 3.39                                    | 7          | 42504         | 6                    |
| 2016 | C3F8572     | A64b    | E         | A   | ante | 180                   | 17.4          | 17.05              | 7.5       | 19.8        | 1.42                       | 298.22             | 15.98     | 3.34         | 0.00                                    | 8          | 42506         | 6                    |
| 2015 | C3F8513     | A05     | C         | Y   | post |                       |               |                    |           |             |                            |                    |           |              |                                         | 6          | 42127         | 6                    |
| 2015 | C3F8516     | A08     | C         | A   | post | 176                   | 18.4          | 17.32              | 7.6       | 20.2        | 2.53                       | 408.89             | 8.75      | 7.67         | 3.12                                    | 11         | 42132         | 11                   |
| 2015 | C3F8519     | A11     | E         | Y   | post | 180                   | 17.2          | 13.34              | 8.1       | 21.3        | 1.91                       | 268.69             | 17.83     | 17.51        | 2.32                                    | 7          | 42132         | 6                    |
| 2015 | C3F8521     | A13     | C         | A   | post | 178                   | 17.1          | 16.09              | 7.6       | 20.7        | 1.08                       | 294.39             | 8.08      | 14.29        | 3.17                                    | 9          | 42132         | 9                    |
| 2015 | C3F8523     | A15     | E         | A   | post |                       |               |                    |           |             |                            |                    |           |              |                                         | 10         | 42132         | 10                   |
| 2015 | C3F8524     | A16     | C         | A   | post | 176                   | 18.3          | 17.22              | 7.6       | 19.7        | 2.32                       | 264.60             | 11.44     | 9.28         | 2.08                                    | 7          | 42132         | 7                    |
| 2015 | C3F8526     | A18     | E         | A   | post | 150                   | 17.8          | 16.75              | 7.6       | 20.6        | 3.12                       | 495.07             | 29.08     | 14.29        | 1.04                                    | 8          | 42131         | 6                    |
| 2015 | C3F8527     | A19     | E         | A   | post |                       |               |                    |           |             |                            |                    |           |              |                                         | 6          | 42134         | 5                    |
| 2015 | C3F8529     | A21     | C         | Y   | post | 248                   | 17.8          | 16.10              | 7.7       | 21.4        | 0.78                       | 283.41             | 8.08      | 12.96        | 2.77                                    | 7          | 42140         | 5                    |
| 2015 | C3F8530     | A22     | E         | Y   | post | 138                   | 17.8          | 15.48              | 7.8       | 19.6        | 2.90                       | 502.58             | 18.17     | 8.96         | 2.39                                    | 7          | 42134         | 6                    |
| 2015 | C3F8532     | A24     | C         | A   | post | 178                   | 18.4          | 17.32              | 7.6       | 20.1        | 1.86                       | 423.51             | 7.40      | 29.42        | 3.18                                    | 9          | 42134         | 5                    |
| 2015 | C3F8534     | A26     | E         | A   | post | 180                   | 17.0          | 15.38              | 7.7       | 19.2        | 4.55                       | 502.67             | 28.10     | 12.94        | 2.17                                    | 8          | 42134         | 4                    |
| 2015 | C3F8536     | A28     | C         | A   | post |                       |               |                    |           |             |                            |                    |           |              |                                         | 7          | 42134         | 5                    |
| 2015 | C3F8537     | A29     | E         | Y   | post | 240                   | 18.0          | 14.49              | 8.0       | 20.0        | 1.28                       | 482.20             | 35.06     | 30.51        | 1.54                                    | 6          | 42134         | 5                    |
| 2015 | C3F8539     | A31     | C         | A   | post | 131                   | 17.4          | 16.38              | 7.6       | 19.1        | 2.75                       | 403.62             | 26.25     | 14.01        | 2.18                                    | 7          | 42135         | 7                    |
| 2015 | C3F8541     | A33     | C         | A   | post | 155                   | 18.0          | 17.64              | 7.5       | 20.2        | 2.38                       | 82.26              | 39.70     | 4.05         | 3.26                                    | 8          | 42137         | 8                    |
| 2015 | C3F8543     | A35     | E         | A   | post | 170                   | 17.5          | 14.64              | 7.9       | 19.7        | 2.15                       | 236.99             | 19.85     | 9.82         | 2.15                                    | 7          | 42135         | 7                    |
| 2015 | C3F8550     | A42     | C         | Y   | post | 136                   | 19.2          | 16.06              | 7.9       | 21.2        | 5.27                       | 521.50             | 21.20     | 3.02         | 0.95                                    | 8          | 42135         | 8                    |
| 2015 | C3F8552     | A44     | E         | A   | post | 180                   | 16.9          | 15.29              | 7.7       | 20.0        | 2.30                       | 117.97             | 31.35     | 15.36        | 2.42                                    | 8          | 42136         | 6                    |

|      |         |      |   |   |      |     |      |       |     |      |      |        |       |       |      |    |       |   |
|------|---------|------|---|---|------|-----|------|-------|-----|------|------|--------|-------|-------|------|----|-------|---|
| 2015 | C3F8553 | A45  | E | A | post |     |      |       |     |      |      |        |       |       |      | 10 | 42136 | 6 |
| 2015 | C3F8557 | A49  | E | A | post |     |      |       |     |      |      |        |       |       |      | 8  | 42137 | 2 |
| 2015 | C3F8558 | A50  | C | A | post | 180 | 17.7 | 16.01 | 7.7 | 20.2 | 0.84 | 218.66 | 8.75  | 19.98 | 0.90 | 6  | 42138 | 2 |
| 2015 | C3F8559 | A51  | E | A | post | 135 | 17.8 | 20.60 | 7.1 | 20.0 | 3.21 | 290.17 | 14.13 | 17.71 | 1.08 | 8  | 42138 | 8 |
| 2015 | C3F8560 | A52  | E | Y | post | 120 | 18.7 | 17.60 | 7.6 | 19.8 | 1.07 | 253.50 | 27.59 | 8.27  | 0.69 | 8  | 42138 | 8 |
| 2015 | C3F8563 | A55  | C | A | post | 180 | 17.9 | 17.54 | 7.5 | 19.7 | 8.19 | 379.72 | 37.69 | 5.53  | 0.95 | 6  | 42140 | 5 |
| 2015 | C3F8565 | A57  | E | A | post | 180 | 15.8 | 16.81 | 7.3 | 19.9 | 1.56 | 272.79 | 15.38 | 14.61 | 1.94 | 5  | 42140 | 5 |
| 2015 | C3F8566 | A58  | E | Y | post | 180 | 17.8 | 18.94 | 7.3 | 20.3 | 0.68 | 261.18 | 31.63 | 4.33  | 2.50 | 7  | 42141 | 2 |
| 2015 | C3F8572 | A64  | C | A | post | 143 | 17.6 | 20.37 | 7.1 | 19.0 | 0.94 | 239.78 | 0.34  | 8.61  | 2.08 | 7  | 42146 | 7 |
| 2015 | C3F8574 | A66  | E | A | post | 145 | 16.7 | 17.05 | 7.4 | 20.0 | 0.62 | 107.22 | 24.90 | 5.24  | 0.94 | 8  | 42151 | 4 |
| 2015 | C3F8576 | A68  | E | Y | post | 90  | 16.6 | 15.62 | 7.6 | 19.1 | 3.49 | 142.25 | 11.10 | 18.24 | 2.45 | 5  | 42157 | 5 |
| 2016 | C3F8588 | A80  | E | A | post | 180 | 18.0 | 16.28 | 7.7 | 19.9 | 1.97 | 295.01 | 32.47 | 2.87  | 0.40 | 7  | 42498 | 4 |
| 2016 | C3F8596 | A88  | E | Y | post | 120 | 18.0 | 18.37 | 7.4 | 20.4 | 1.82 | 365.98 | 18.17 | 1.95  | 3.54 | 9  | 42501 | 5 |
| 2016 | C3K6201 | A91  | C | A | post | 168 | 17.7 | 18.07 | 7.4 | 19.1 | 1.94 | 248.61 | 12.30 | 2.43  | 4.47 | 7  | 42502 | 5 |
| 2016 | C3K6203 | A93  | C | A | post |     |      |       | 7.6 | 20.1 |      |        |       |       |      | 8  | 42502 | 6 |
| 2016 | C3K6205 | A95  | C | Y | post | 165 | 18.0 | 17.64 | 7.5 | 19.9 | 1.81 | 194.14 | 20.41 | 3.11  | 6.10 | 10 | 42505 | 4 |
| 2016 | C3K6207 | A97  | E | Y | post |     |      |       | 7.5 | 20.0 |      |        |       |       |      | 9  | 42505 | 5 |
| 2016 | C3K6209 | A99  | C | A | post | 160 | 18.2 | 17.83 | 7.5 | 20.2 | 3.01 | 259.27 | 28.94 | 0.91  | 1.81 | 7  | 42505 | 7 |
| 2016 | C3K6210 | A100 | C | A | post | 146 | 17.6 | 17.96 | 7.4 | 19.9 | 2.50 | 301.07 | 22.88 | 4.68  | 2.17 | 6  | 42507 | 4 |
| 2016 | C3K6212 | A102 | C | A | post | 165 | 18.6 | 18.23 | 7.5 | 21.0 | 1.94 |        | 6.73  | 12.95 |      | 7  | 42507 | 7 |
| 2016 | C3K6218 | A108 | E | A | post | 168 | 16.8 | 15.81 | 7.6 | 20.5 | 1.97 | 350.55 | 29.95 | 2.94  | 1.27 | 6  | 42527 | 6 |
| 2016 | C3K6219 | A109 | E | A | post |     |      |       | 7.5 | 19.5 |      |        |       |       |      | 7  | 42528 | 2 |
| 2016 | C3K6220 | A110 | E | Y | post | 138 | 17.1 | 16.09 | 7.6 | 19.9 | 4.68 | 210.92 | 43.07 | 2.03  |      | 7  | 42497 | 5 |
| 2016 | C3K6221 | A111 | C | Y | post | 180 | 16.8 | 15.81 | 7.6 | 19.9 | 2.00 |        | 26.25 | 7.92  | 0.00 | 9  | 42496 | 6 |
| 2016 | C3K6222 | A112 | E | A | post | 148 | 17.0 | 17.35 | 7.4 | 20.0 |      |        |       | 11.69 |      | 9  | 42503 | 4 |
| 2016 | C3K6225 | A115 | E | A | post | 169 | 16.7 | 13.97 | 7.9 | 20.2 | 1.31 | 369.36 | 27.25 | 14.39 | 4.67 | 6  | 42534 | 6 |
| 2016 | C3K6227 | A117 | C | A | post |     |      |       | 7.5 | 19.8 |      |        |       | 4.61  |      | 9  | 42536 | 6 |
| 2016 | C3F8622 | N22  | C | Y | post | 120 | 18.0 | 17.64 | 7.5 | 20.0 | 3.00 | 345.78 | 23.39 | 2.59  | 2.01 | 8  | 42498 | 6 |
| 2016 | C3F8695 | N95  | E | Y | post |     | 17.4 | 17.76 | 7.4 | 20.3 | 1.23 | 318.80 | 37.01 | 4.49  |      | 9  | 42498 | 7 |
| 2016 | C3F8607 | N07  | C | Y | post | 180 | 17.3 | 18.40 | 7.3 | 19.9 | 1.62 | 138.19 | 14.30 | 3.87  | 0.00 | 9  | 42500 | 7 |
| 2016 | C3F8523 | A15b | E | A | post | 107 | 18.2 | 15.23 | 7.9 | 20.8 | 1.71 | 203.03 | 21.37 | 11.33 | 3.80 | 8  | 42492 | 8 |
| 2016 | C3F8558 | A50b | C | A | post | 90  | 17.5 | 15.83 | 7.7 | 20.0 | 1.42 | 350.84 | 30.62 | 5.53  |      | 11 | 42502 | 1 |
| 2016 | C3F8565 | A57b | C | A | post | 125 | 16.2 | 15.87 | 7.5 | 19.6 | 1.46 | 233.38 | 17.50 | 8.13  | 2.27 | 7  | 42502 | 5 |
| 2016 | C3F8570 | A62b | E | A | post | 150 | 18.0 | 18.37 | 7.4 | 19.8 | 2.87 | 299.44 | 29.61 | 21.1  | 2.65 | 7  | 42504 | 6 |
| 2016 | C3F8572 | A64b | E | A | post | 120 | 17.4 | 17.05 | 7.5 | 19.8 | 1.31 | 287.56 | 33.48 | 2.15  | 1.63 | 8  | 42506 | 6 |

| Nestling average body condition (g) | Nest provisioning std (sqrt(n visits/h)/Brood size) | Mate Nest provisioning std (sqrt(n visits/h)/Brood size) | Change Cort (ng/mL) | Change Body condition (g) | ChangeBody mass | Change GPx (U/L) | Survival | Day 12 nest provisioning (number of visits/h) |
|-------------------------------------|-----------------------------------------------------|----------------------------------------------------------|---------------------|---------------------------|-----------------|------------------|----------|-----------------------------------------------|
| 15.10                               | 1.52                                                | 0.45                                                     |                     |                           |                 |                  | 0        |                                               |
| 16.50                               | 2.61                                                | 1.90                                                     | -5.62               | -0.38                     | -0.40           | -28.20           | 1        | 4.71                                          |
| 15.18                               | 0.00                                                | 0.00                                                     | 8.44                | -0.31                     | -0.40           | -6.80            | 0        | 1.74                                          |
| 15.30                               | 1.25                                                | 1.05                                                     |                     | -0.19                     | -0.20           | -7.96            | 0        | 5.11                                          |
| 17.43                               | 2.12                                                | 0.91                                                     |                     |                           |                 |                  | 1        | 5.66                                          |
| 17.68                               | 0.85                                                | 1.13                                                     | 5.63                | 0.66                      | 0.70            | -8.34            | 0        | 4.71                                          |
| 16.45                               | 2.08                                                | 1.41                                                     | 10.63               | -1.04                     | -1.10           | 24.04            | 0        | 4.80                                          |
| 13.32                               | 2.14                                                | 1.90                                                     |                     |                           |                 |                  | 1        | 4.80                                          |
| 18.93                               | 0.45                                                | 0.63                                                     | 7.44                | -0.36                     | -0.40           | 0.67             | 0        | 3.31                                          |
| 15.22                               | 1.91                                                | 1.00                                                     | -1.76               | 0.35                      | 0.40            | 7.40             | 0        | 4.45                                          |
| 16.23                               | 1.73                                                | 1.26                                                     | 15.44               | -0.09                     | -0.10           | -1.68            | 1        | 5.81                                          |
| 18.16                               | 2.92                                                | 1.66                                                     | 10.30               | -0.63                     | -0.70           | 19.35            | 0        | 2.66                                          |
| 13.60                               |                                                     |                                                          |                     |                           |                 |                  | 0        |                                               |
| 13.61                               | 1.67                                                | 1.67                                                     | 18.32               | 0.24                      | 0.30            | 17.90            | 0        | 3.31                                          |
| 17.26                               | 1.65                                                | 1.31                                                     | 10.99               | -0.38                     | -0.40           | 11.78            | 0        | 6.30                                          |
| 16.96                               | 1.37                                                | 1.00                                                     | -0.46               | 0.39                      | 0.40            | 11.44            | 0        | 6.40                                          |
| 13.91                               | 1.81                                                | 1.60                                                     | 5.89                | -0.50                     | -0.60           | 10.09            | 1        | 6.55                                          |
| 13.86                               | 1.80                                                | 1.80                                                     | -15.06              | 0.00                      | 0.00            | 17.83            | 0        | 5.38                                          |
| 17.03                               | 0.00                                                | 0.89                                                     | 12.59               | -0.63                     | -0.70           | 23.11            | 0        | 4.80                                          |
| 16.34                               | 2.79                                                | 6.00                                                     |                     |                           |                 |                  | 1        |                                               |
| 23.06                               | 3.74                                                | 2.35                                                     |                     |                           |                 |                  | 0        | 2.46                                          |
| 15.10                               | 0.00                                                | 1.87                                                     | 5.86                | -0.09                     | -0.10           | -11.10           | 1        |                                               |
| 21.32                               | 1.70                                                | 0.79                                                     | 12.52               | -0.58                     | -0.50           | 1.35             | 0        | 5.20                                          |
| 17.53                               | 1.77                                                | 1.54                                                     | 3.14                | -1.04                     | -1.10           | 12.45            | 0        | 5.48                                          |
| 16.43                               | 0.89                                                | 2.68                                                     | 0.75                | 0.29                      | 0.30            | 33.65            | 0        | 3.17                                          |
| 17.87                               | 2.37                                                | 1.95                                                     | 3.55                | -1.49                     | -1.40           | -3.12            | 1        |                                               |
| 21.48                               | 3.08                                                | 4.95                                                     | -6.69               | -0.32                     | -0.30           | 4.71             | 1        | 5.20                                          |
|                                     | 1.89                                                | 1.85                                                     | 2.38                | 0.23                      | 0.20            | -27.25           | 1        | 4.12                                          |
| 13.78                               | 1.58                                                | 1.32                                                     | -9.85               | -0.51                     | -0.50           | 7.23             | 0        | 3.61                                          |
| 18.24                               | 1.34                                                | 0.45                                                     | 11.28               | -0.85                     | -0.90           | -1.51            | 0        | 1.42                                          |
| 25.58                               | 1.80                                                | 1.58                                                     | -3.13               | 0.18                      | 0.20            | 12.45            | 0        | 3.17                                          |
| 42.22                               | 2.32                                                | 1.26                                                     | 0.83                | 0.20                      | 0.20            | 0.50             | 1        | 0.00                                          |
| 15.86                               | 2.06                                                | 2.00                                                     | -2.43               | 0.31                      | 0.30            | -0.84            | 0        | 3.28                                          |
| 24.66                               | 1.96                                                | 1.35                                                     |                     |                           |                 |                  | 1        | 2.99                                          |
| 36.23                               | 2.60                                                | 1.32                                                     | 2.62                | 0.39                      | 0.40            | -0.11            | 1        | 4.45                                          |
| 15.11                               | 1.41                                                |                                                          |                     |                           |                 |                  | 1        | 1.42                                          |
| 16.21                               | 2.07                                                | 1.89                                                     | -3.18               | 0.00                      | 0.00            | 4.37             | 0        |                                               |
| 21.63                               | 2.55                                                | 0.00                                                     | 3.25                | -0.10                     | -0.10           | -8.08            | 0        | 0.00                                          |
| 23.67                               | 0.38                                                | 1.65                                                     |                     |                           |                 |                  | 0        |                                               |
| 13.43                               | 1.35                                                | 1.63                                                     | -2.89               | -0.09                     | -0.10           | -8.08            | 1        | 3.65                                          |
| 14.26                               | 2.24                                                | 1.73                                                     |                     |                           |                 |                  | 1        | 1.00                                          |
| 23.90                               | 1.90                                                | 0.77                                                     |                     | 0.09                      | 0.10            | 36.68            | 0        | 4.37                                          |
| 16.30                               | 1.53                                                | 0.00                                                     | -4.22               | -0.47                     | -0.50           | -3.70            | 0        | 4.37                                          |
| 31.73                               | 2.60                                                | 1.94                                                     | 5.60                | -0.51                     | -0.50           |                  | 0        | 0.77                                          |
| 18.68                               | 1.30                                                | 1.08                                                     | 1.24                | -0.67                     | -0.80           | -6.39            | 1        | 3.20                                          |
| 15.05                               | 0.71                                                | 0.91                                                     |                     |                           |                 |                  | 0        | 2.04                                          |
| 25.10                               | 1.47                                                | 0.58                                                     | -3.35               | 0.78                      | 0.80            | -1.68            | 0        | 7.13                                          |
| 14.20                               | 1.50                                                | 1.84                                                     | -9.75               | 0.00                      | 0.00            | 8.41             | 0        | 4.24                                          |
| 23.08                               | 1.96                                                | 1.65                                                     | 0.04                | 0.43                      | 0.40            | -5.38            | 1        | 4.58                                          |
| 13.84                               | 1.00                                                | 1.22                                                     | 8.24                | -0.17                     | -0.20           | 6.22             | 1        | 1.42                                          |
| 16.63                               | 0.00                                                | 0.00                                                     | -3.44               | 0.00                      | 0.00            |                  | 0        | 0.00                                          |
| 20.73                               | 1.48                                                | 1.67                                                     | -6.48               | 0.69                      | 0.70            | -5.05            | 0        | 4.58                                          |
| 20.35                               | 1.53                                                | 1.53                                                     | 11.40               | -0.20                     | -0.20           | 4.71             | 1        | 2.04                                          |
| 30.02                               | 1.96                                                | 1.15                                                     | -1.20               | 0.00                      | 0.00            | 17.50            | 1        | 4.80                                          |
| 15.10                               |                                                     |                                                          |                     |                           |                 |                  |          |                                               |
| 16.50                               | 1.41                                                | 1.84                                                     |                     |                           |                 |                  |          |                                               |
| 15.18                               | 0.71                                                | 1.73                                                     |                     |                           |                 |                  |          |                                               |
| 15.30                               | 1.70                                                | 1.41                                                     |                     |                           |                 |                  |          |                                               |
| 17.43                               | 1.79                                                | 1.47                                                     |                     |                           |                 |                  |          |                                               |
| 17.68                               | 1.77                                                | 2.10                                                     |                     |                           |                 |                  |          |                                               |
| 16.45                               | 1.96                                                | 1.83                                                     |                     |                           |                 |                  |          |                                               |
| 13.32                               | 2.14                                                | 2.76                                                     |                     |                           |                 |                  |          |                                               |
| 18.93                               | 1.48                                                | 1.18                                                     |                     |                           |                 |                  |          |                                               |
| 15.22                               | 1.83                                                | 1.91                                                     |                     |                           |                 |                  |          |                                               |
| 16.23                               | 2.61                                                | 1.73                                                     |                     |                           |                 |                  |          |                                               |
| 18.16                               | 1.32                                                | 2.12                                                     |                     |                           |                 |                  |          |                                               |
| 13.60                               |                                                     |                                                          |                     |                           |                 |                  |          |                                               |
| 13.61                               | 1.48                                                | 1.41                                                     |                     |                           |                 |                  |          |                                               |
| 17.26                               | 2.39                                                | 1.96                                                     |                     |                           |                 |                  |          |                                               |
| 16.96                               | 2.26                                                | 2.15                                                     |                     |                           |                 |                  |          |                                               |
| 13.91                               | 2.48                                                | 0.35                                                     |                     |                           |                 |                  |          |                                               |
| 13.86                               | 1.90                                                | 2.09                                                     |                     |                           |                 |                  |          |                                               |
| 17.03                               | 1.96                                                | 1.15                                                     |                     |                           |                 |                  |          |                                               |

|       |      |      |
|-------|------|------|
| 16.34 |      |      |
| 23.06 | 1.73 | 2.00 |
| 15.10 | 0.00 | 1.87 |
| 21.32 | 1.84 | 1.22 |
| 17.53 | 1.94 | 2.47 |
| 16.43 | 1.41 | 2.19 |
| 17.87 |      |      |
| 21.48 | 3.67 | 4.30 |
|       | 1.56 | 1.22 |
| 13.78 | 1.80 | 1.22 |
| 18.24 | 0.63 | 0.00 |
| 25.58 | 1.58 | 2.60 |
| 42.22 | 0.00 | 0.45 |
| 15.86 | 1.47 | 1.80 |
| 24.66 | 1.22 | 1.14 |
| 36.23 | 2.22 | 1.34 |
| 15.11 |      | 1.20 |
| 16.21 |      |      |
| 21.63 | 0.00 | 0.00 |
| 23.67 |      |      |
| 13.43 | 1.48 | 2.05 |
| 14.26 | 0.71 | 0.00 |
| 23.90 | 1.97 | 1.73 |
| 16.30 | 1.60 | 0.82 |
| 31.73 | 0.39 | 2.68 |
| 18.68 | 1.30 | 1.47 |
| 15.05 | 0.84 | 1.58 |
| 25.10 | 2.92 | 0.71 |
| 14.20 | 1.60 |      |
| 23.08 | 1.73 | 2.21 |
| 13.84 | 0.50 | 2.55 |
| 16.63 | 0.00 | 1.00 |
| 20.73 | 2.05 | 0.45 |
| 20.35 | 0.84 | 1.58 |
| 30.02 | 1.95 | 2.24 |
